# Supplementary material for: Stability of Human Telomeric G-Quadruplexes Complexed with Photosensitive Ligands and Irradiated with Visible Light
Source: MDPI journal article supplement (doi:10.3390/ijms24109090), 2023-05-22
Supplement: s1 [file s1]

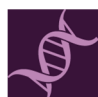

# Supporting Material for “Stability of Human Telomeric G-Quadruplexes complexed with Photosensitive Ligands and Irradiated with Visible Light”

Valeria Libera <sup>1,2,†</sup>, Francesca Ripanti <sup>1,†</sup>, Caterina Petrillo <sup>1</sup>, Francesco Sacchetti <sup>1</sup>, Javier Ramos-Soriano <sup>3</sup>, Maria Carmen Galan <sup>3</sup>, Giorgio Schirò <sup>4</sup>, Alessandro Paciaroni <sup>1,\*</sup>, and Lucia Comez <sup>2,\*</sup>

<sup>1</sup> Department of Physics and Geology, University of Perugia, Via Alessandro Pascoli, 06123 Perugia, Italy; valeria.libera@studenti.unipg.it (V.L.)

<sup>2</sup> Italian National Research Council-Istituto Officina dei Materiali(IOM) c/o Department of Physics and Geology, University of Perugia, , Via Alessandro Pascoli, 06123 Perugia, Italy

<sup>3</sup> School of Chemistry, University of Bristol, Cantock's Close, Bristol BS8 1TS, UK

<sup>4</sup> CNRS, CEA, IBS, c/o University Grenoble Alpes, 38400 Grenoble, France

\* Correspondence: alessandro.paciaroni@unipg.it (A.P.); comez@iom.cnr.it (L.C.)

† These authors contributed equally to this work.

## S1. Experimental setup

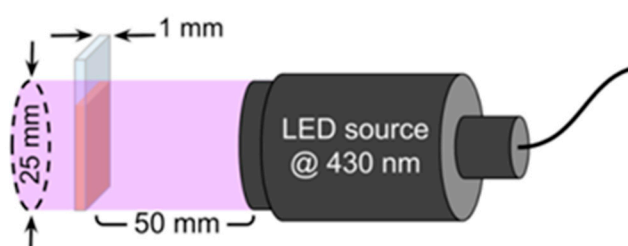

**Figure S1.** Custom-made setup for illumination. The entire setup is contained in a dark box and all the parts are fixed to high-precision stages to guarantee reproducibility and stability of the measurements.

## S2. Reversible properties of DTE ligand

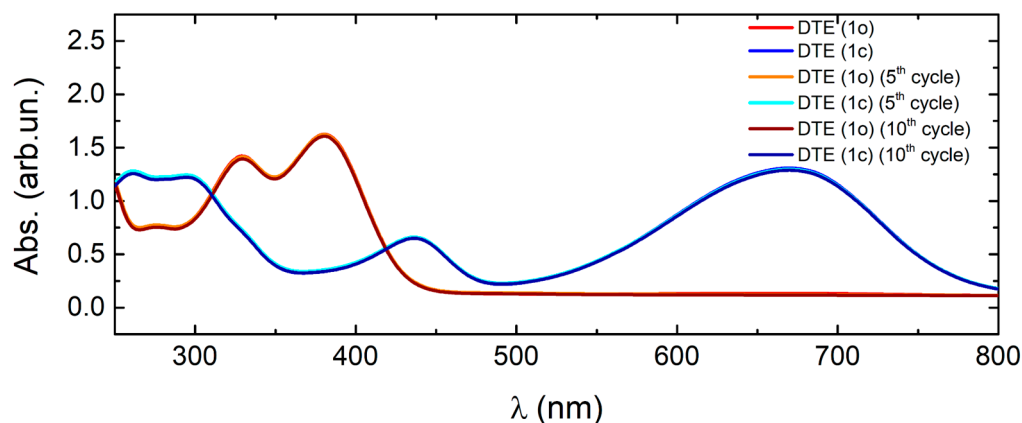

**Figure S2.** Absorption spectra of DTE (1o) and (1c) after different irradiation cycles. The process is perfectly reversible and reproducible for several cycles.

## S3. Titration experiment on Tel22-DTE (1o) complex

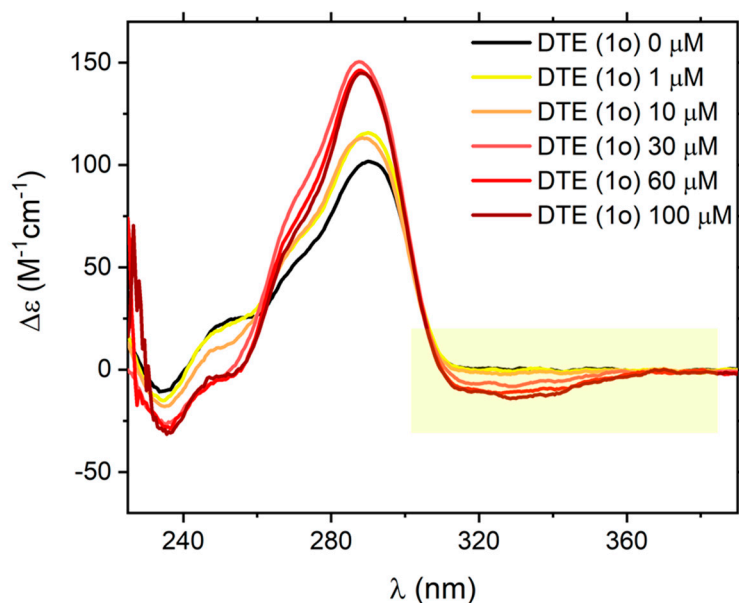

**Figure S3.** CD titration measurements of Tel22 at a fixed concentration of 30  $\mu\text{M}$  and gradually increasing amount of DTE (1o).

#### S4. SAXS experiments

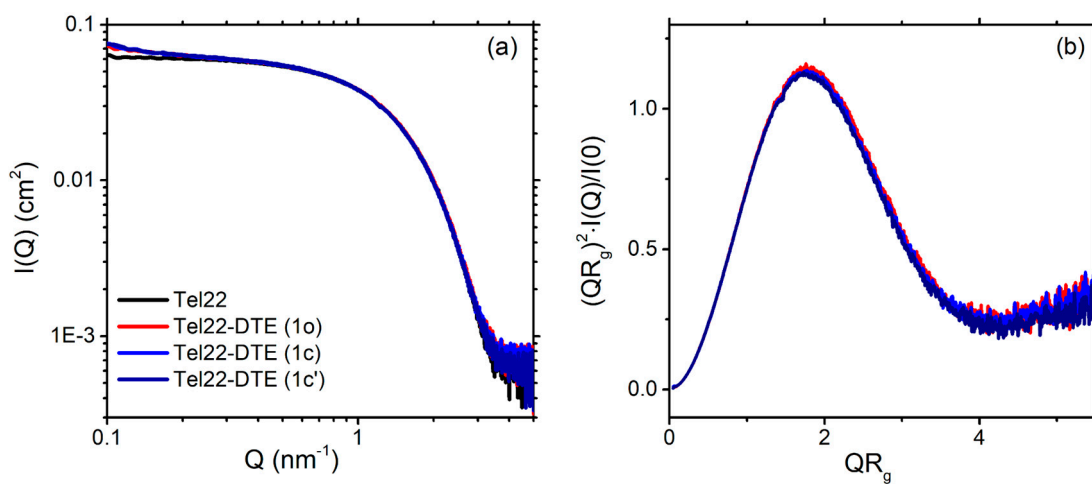

**Figure S4.** (a) SAXS patterns recorded at BM29 beamline (ESRF, <https://www.esrf.fr/>) of Tel22 and Tel22-DTE complexes. (b) Corresponding dimensionless Kratky plot. The peak position at 1.75 with the height of  $3/e \approx 1.1$  indicates a compact, folded structure.

#### S5. Application of CD deconvolution algorithm to Tel22 and Tel22-ligand complexes

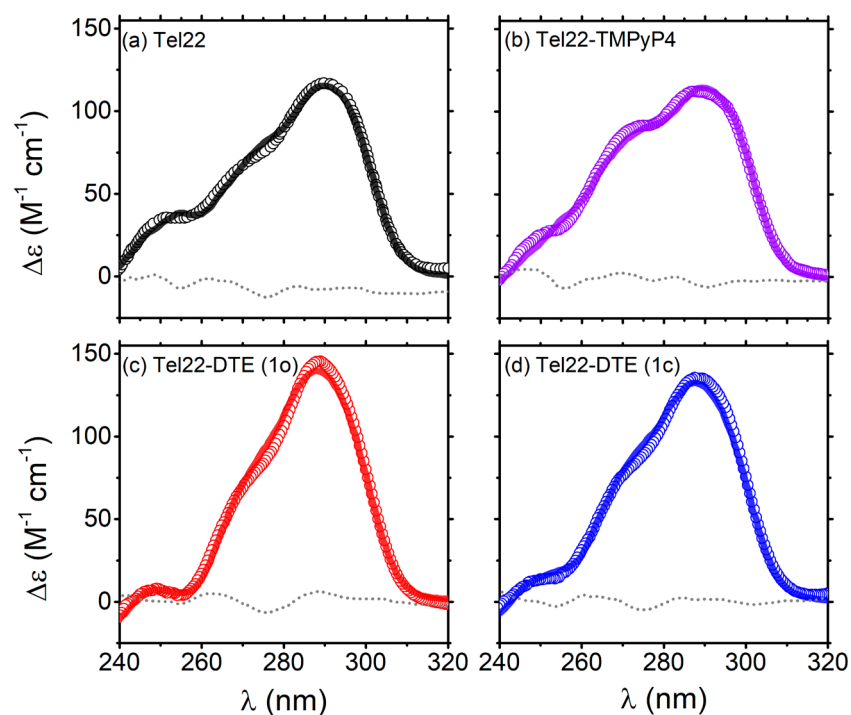

**Figure S5.** CD experimental (symbols) and theoretical (lines) fit curves obtained by using the routine developed in Ref. [1]. Residuals are represented as dots.

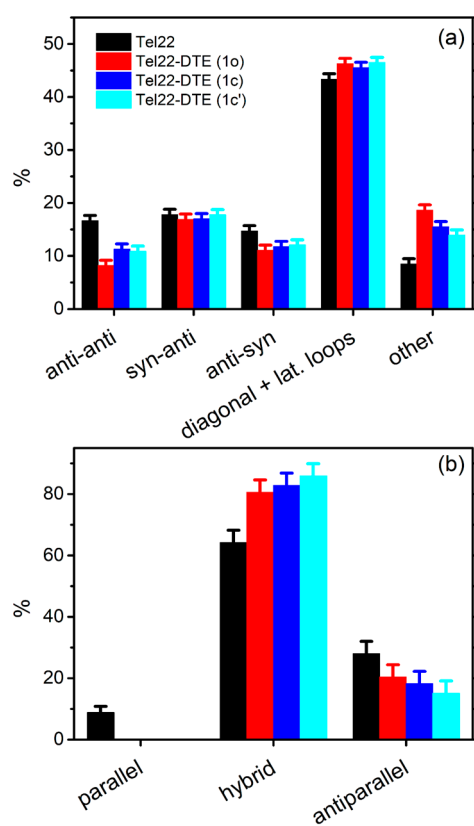

**Figure S6.** Percentage of components obtained from the analysis of CD spectra by means of the routine developed in Ref. [S1]: (a) secondary and (b) tertiary structure contributions.

## S6. Blue light illumination of Tel22-TMPyP4 complex

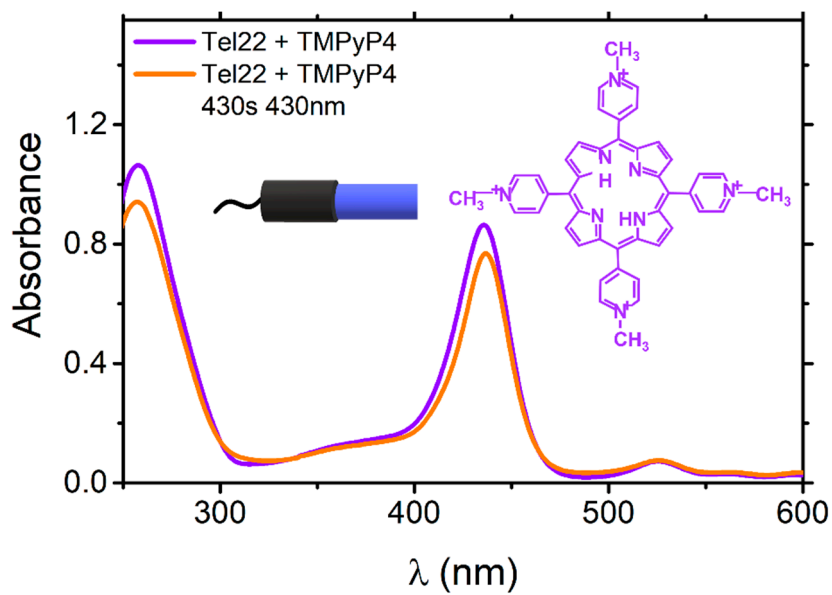

**Figure S7.** Absorption spectra of Tel22-TMPyP4 before (purple) and after (orange) 480 s irradiation with blue light.

## S7. Interpretation of melting pathways

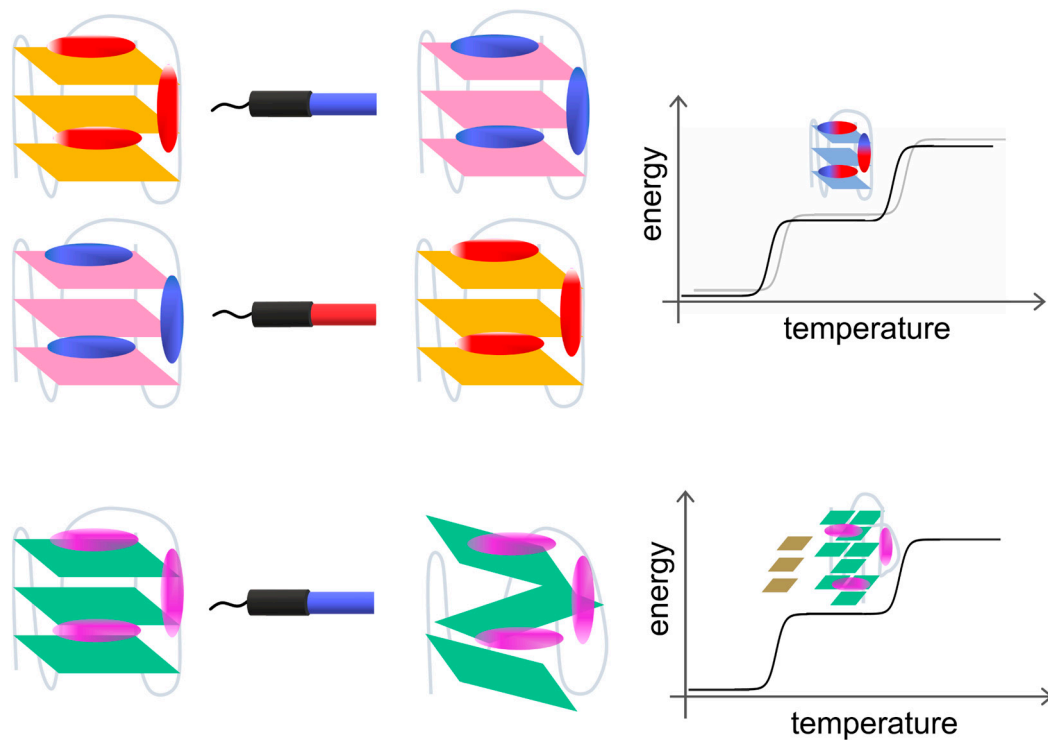

**Figure S8.** Schematic representation of the thermal pathway for Tel22-DTE (1c) and Tel22-TMPyP4 complexes.

|                   | $\Delta H_1$<br>(Kcal/mol) | $\Delta H_2$<br>(Kcal/mol) | $\Delta H_3$<br>(Kcal/mol) | $T_{m1}$ (K)    | $T_{m2}$ (K) | $T_{m3}$ (K) |
|-------------------|----------------------------|----------------------------|----------------------------|-----------------|--------------|--------------|
| Tel22-DTE<br>(1o) | -37 $\pm$ 3                | -12.6 $\pm$ 1.2            | -50 $\pm$ 4                | 313 $\pm$ 2     | 341 $\pm$ 2  | 348 $\pm$ 2  |
| Tel22-DTE<br>(1c) | -15.9 $\pm$ 1.3            | -23 $\pm$ 2                | -50.9 $\pm$ 4.1            | 317.6 $\pm$ 2.1 | 340 $\pm$ 2  | 349 $\pm$ 2  |

**Table S1.** Thermodynamic parameters obtained from SVD analysis of Tel22-DTE samples.

|                                  | $\Delta H_1$ (Kcal/mol) | $\Delta H_2$ (Kcal/mol) | $T_{m1}$ (K)    | $T_{m2}$ (K)    |
|----------------------------------|-------------------------|-------------------------|-----------------|-----------------|
| Tel22-TMPyP4                     | -26 $\pm$ 2             | -59 $\pm$ 5             | 323 $\pm$ 2     | 344.5 $\pm$ 1.9 |
| Tel22-TMPyP4<br>i.t. 30s 430 nm  | -26 $\pm$ 2             | -51 $\pm$ 4             | 321.5 $\pm$ 1.8 | 345.5 $\pm$ 1.8 |
| Tel22-TMPyP4<br>i.t. 120s 430 nm | -23 $\pm$ 2             | -48 $\pm$ 3             | 323 $\pm$ 2     | 344 $\pm$ 2     |
| Tel22-TMPyP4<br>i.t. 480s 430 nm | -21 $\pm$ 2             | -42 $\pm$ 3             | 323 $\pm$ 2     | 339 $\pm$ 2     |

**Table S2.** Thermodynamic parameters obtained from SVD analysis of Tel22-TMPyP4 samples.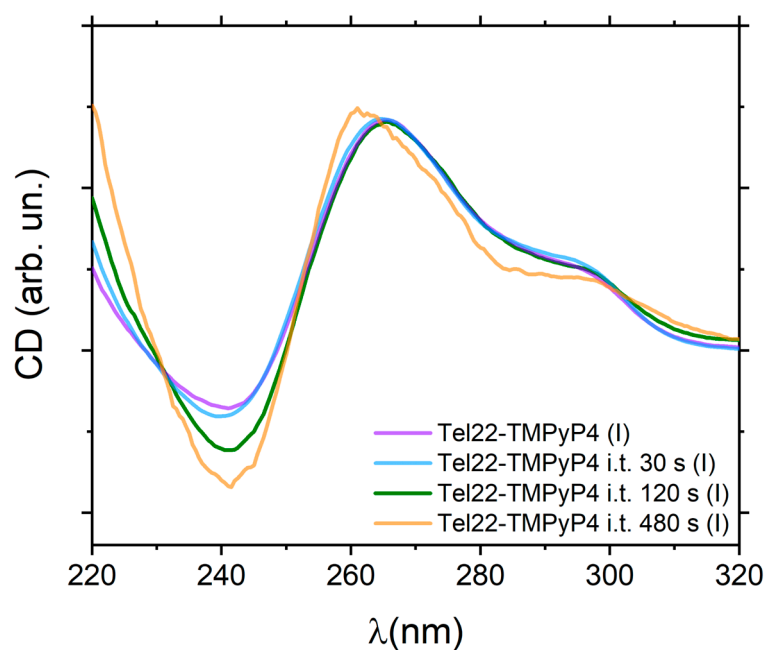**Figure S9.** The same CD profiles of Figure 6 reproducing the different intermediate states, reconstructed via SVD, normalized for sake of comparison.

S8. Tel22-DTE in Na<sup>+</sup> environment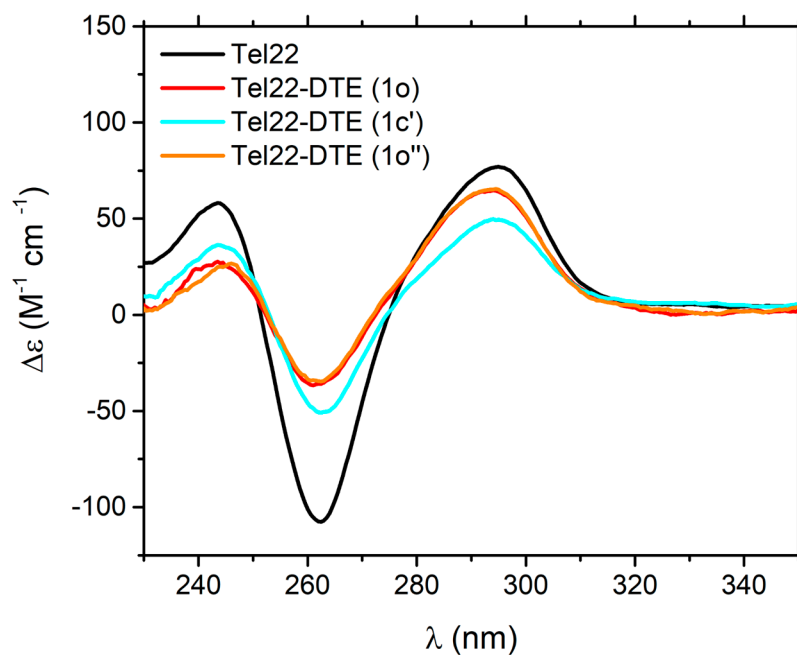

**Figure S10.** CD spectra of Tel22 (black), Tel22-DTE (1o) (red), and Tel22-DTE (1c') (blue) obtained from Tel22-DTE (1o) after i.t. 10 min at 430 nm, and Tel22-DTE (1o'') obtained from the previous one after i.t. 90 min at 660 nm. All the samples were prepared in Na<sup>+</sup> buffer. These measurements indicate the complete reversibility of Tel22-DTE complexes in this environment.

## S9. Blue light illumination of Tel22-DTE complex

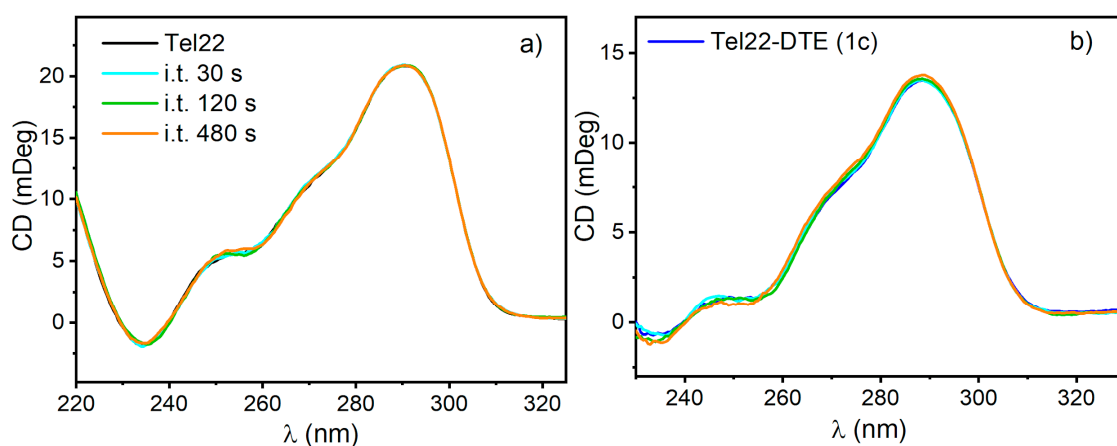

**Figure S11.** a) CD spectra of Tel22 (black), Tel22 i.t. 30 s (light blue), Tel22 i.t. 120 s (green), Tel22 i.t. 480 s (orange). b) CD spectra of Tel22-DTE (1c) (blue), Tel22-DTE (1c) i.t. 30 s (light blue), Tel22-DTE (1c) i.t. 120 s (green), Tel22-DTE (1c) i.t. 480 s (orange).

## S10. SVD applied to Tel22-DTE (1o) melting spectra

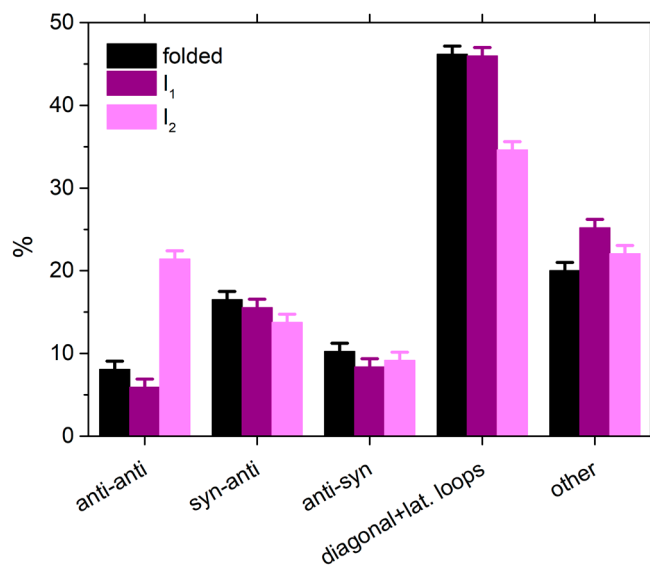

**Figure S12.** Percentage of components obtained from the analysis of CD spectra upon melting of Tel22-DTE (1o) complex through the routine developed in Ref. [S1].

## References

- S1. Del Villar-Guerra, R.; Trent, J.O.; Chaires, J.B. G-Quadruplex Secondary Structure Obtained from Circular Dichroism Spectroscopy. *Angew. Chem. Int. Ed Engl.* **2018**, *57*, 7171–7175.
